# Supplementary material for: Zr-Rich Eudialyte from the Lovozero Peralkaline Massif, Kola Peninsula, Russia
Source: MDPI journal article supplement (doi:10.3390/min11090982), 2021-09-09
Supplement: s1 [file s1]

**Table 3 Anisotropic Displacement Parameters ( $\text{\AA}^2 \times 10^3$ ) for 117–226. The Anisotropic displacement factor exponent takes the form:  $-2\pi^2[h^2a^{*2}U_{11}+2hka^*b^*U_{12}+\dots]$ .**

| Atom | $U_{11}$ | $U_{22}$ | $U_{33}$ | $U_{23}$  | $U_{13}$  | $U_{12}$  |
|------|----------|----------|----------|-----------|-----------|-----------|
| M2B  | 16(6)    | 11(6)    | 23(5)    | −2(3)     | −6(6)     | −2(5)     |
| Z1   | 11.3(4)  | 11.3(3)  | 7.9(3)   | −0.36(12) | −0.7(2)   | 5.64(19)  |
| M1B  | 21.4(9)  | 12.1(9)  | 10.1(10) | −1.5(6)   | −0.7(3)   | 6.0(5)    |
| Ce1  | 21.4(9)  | 12.1(9)  | 10.1(10) | −1.5(6)   | −0.7(3)   | 6.0(5)    |
| M2A  | 66(3)    | 239(10)  | 14.8(15) | −43(3)    | −21.6(13) | 120(5)    |
| M3   | 1.3(14)  | 1.3(14)  | 82(5)    | 0         | 0         | 0.7(7)    |
| M1A  | 26.3(8)  | 6.2(8)   | 8.1(8)   | −0.7(5)   | −0.3(3)   | 3.1(4)    |
| Zr2  | 26.3(8)  | 6.2(8)   | 8.1(8)   | −0.7(5)   | −0.3(3)   | 3.1(4)    |
| X2C  | 57(6)    | 149(17)  | 75(7)    | 10(10)    | −32(5)    | 36(9)     |
| M4   | 10(2)    | 10(2)    | 8(3)     | 0         | 0         | 4.8(12)   |
| Si1  | 13.5(7)  | 11.8(10) | 15.8(7)  | 3.7(10)   | 5.2(6)    | 7.0(10)   |
| Si2  | 15.4(10) | 9.9(10)  | 11.7(11) | −1.4(8)   | −0.2(8)   | 8.2(8)    |
| Si3  | 7.5(9)   | 11.5(10) | 9.8(11)  | −1.8(8)   | −0.6(8)   | 3.1(8)    |
| Si4  | 6.2(7)   | 18.6(11) | 9.4(6)   | −1.5(10)  | 1.3(5)    | 2.1(9)    |
| N3   | 27(3)    | 35(2)    | 22(2)    | −12.8(17) | −8(3)     | 18(3)     |
| N4   | 36(11)   | 43(8)    | 32(7)    | −20(6)    | −19(8)    | 33(10)    |
| N1   | 33(2)    | 45(3)    | 76(2)    | −34(2)    | 24(2)     | −15.0(11) |
| Sr1  | 33(2)    | 45(3)    | 76(2)    | −34(2)    | 24(2)     | −15.0(11) |
| O1   | 28(3)    | 12(3)    | 26(4)    | −5(2)     | −8(3)     | 13(2)     |
| O2   | 12(3)    | 60(6)    | 98(5)    | 40(5)     | 10(3)     | 13(4)     |
| O3   | 18(2)    | 21(3)    | 14.6(18) | 0(3)      | 3.5(16)   | 9(3)      |
| O4   | 77(5)    | 33(4)    | 8(3)     | 3(3)      | 7(3)      | 45(4)     |
| O5   | 15(3)    | 24(2)    | 23(2)    | 7.8(16)   | 3(2)      | 12(3)     |
| O6   | 23(3)    | 32(4)    | 22(4)    | −8(3)     | −6(3)     | 7(3)      |
| O7   | 18(3)    | 23(3)    | 9(3)     | 3(2)      | 1(2)      | 6(2)      |
| O8   | 27(4)    | 14(3)    | 26(4)    | −6(3)     | 4(3)      | 10(3)     |
| O9   | 22(2)    | 40(4)    | 19(2)    | −2(3)     | 10.5(17)  | 10(3)     |
| O10  | 16(3)    | 19(3)    | 35(2)    | 2(3)      | 1(3)      | 13(2)     |
| O11  | 21(2)    | 47(4)    | 17(2)    | −6(4)     | −5.8(17)  | 12(3)     |
| O12  | 32(3)    | 23(3)    | 18(4)    | 1(3)      | 4(3)      | 20(3)     |
| O14  | 14(6)    | 14(6)    | 4(7)     | 0         | 0         | 7(3)      |
| X1A  | 130(30)  | 130(30)  | 34(19)   | 0         | 0         | 63(13)    |
| X2A  | 31(5)    | 31(5)    | 87(11)   | 0         | 0         | 16(2)     |
| X2B  | 10(3)    | 10(3)    | 6(4)     | 0         | 0         | 4.9(15)   |
| X1B  | 130(40)  | 130(40)  | 40(30)   | 0         | 0         | 70(20)    |
