# Supplementary material for: Zr-Rich Eudialyte from the Lovozero Peralkaline Massif, Kola Peninsula, Russia
Source: MDPI journal article supplement (doi:10.3390/min11090982), 2021-09-09
Supplement: s1 [file s1]

**Table S3. Selected bond lengths for crystal structure lv-117-226**

| Bond                 | Length    | Bond                  | Length    |
|----------------------|-----------|-----------------------|-----------|
| Z1–O6 <sup>3</sup>   | 2.058(7)  | Si2–O4                | 1.640(6)  |
| Z1–O6 <sup>4</sup>   | 2.058(7)  | Si2–O5                | 1.641(7)  |
| Z1–O8 <sup>5</sup>   | 2.082(6)  | Si2–O6                | 1.588(7)  |
| Z1–O8                | 2.082(6)  | Si2–O12               | 1.589(7)  |
| Z1–O11 <sup>5</sup>  | 2.071(5)  | <Si2–O>               | 1.615     |
| Z1–O11               | 2.071(5)  |                       |           |
| <Z1–O>               | 2.070     | Si3–O1 <sup>9</sup>   | 1.646(6)  |
|                      |           | Si3–O5                | 1.638(7)  |
| M1A–O3 <sup>9</sup>  | 2.431(7)  | Si3–O7                | 1.595(7)  |
| M1A–O3 <sup>10</sup> | 2.431(7)  | Si3–O8                | 1.592(6)  |
| M1A–O7               | 2.405(7)  | <Si3–O>               | 1.618     |
| M1A–O7 <sup>1</sup>  | 2.405(7)  |                       |           |
| M1A–O9               | 2.309(8)  | Si4–O9                | 1.580(4)  |
| M1A–O9 <sup>1</sup>  | 2.309(8)  | Si4–O10               | 1.647(8)  |
| <M1A–O>              | 2.382     | Si4–O10 <sup>13</sup> | 1.637(8)  |
|                      |           | Si4–O11               | 1.600(4)  |
| M1B–O3               | 2.370(7)  | <Si4–O>               | 1.616     |
| M1B–O3 <sup>1</sup>  | 2.370(7)  |                       |           |
| M1B–O9 <sup>6</sup>  | 2.289(9)  | N1–O3 <sup>1</sup>    | 2.661(5)  |
| M1B–O9 <sup>7</sup>  | 2.289(9)  | N1–O6                 | 2.834(9)  |
| M1B–O12              | 2.314(7)  | N1–O7 <sup>7</sup>    | 2.433(8)  |
| M1B–O12 <sup>1</sup> | 2.314(7)  | N1–O8 <sup>7</sup>    | 2.807(8)  |
| <M1B–O>              | 2.324     | N1–O9 <sup>7</sup>    | 2.835(6)  |
|                      |           | N1–O12                | 2.477(8)  |
| M2A–O7 <sup>1</sup>  | 2.138(8)  | N1–O13 <sup>15</sup>  | 2.79(8)   |
| M2A–O7               | 2.138(8)  | N1–O13 <sup>1</sup>   | 2.79(8)   |
| M2A–O12 <sup>1</sup> | 2.135(8)  | N1 –X2A               | 2.974(8)  |
| M2A–O12              | 2.135(8)  | N1 –X2B               | 2.598(4)  |
| <M2A–O>              | 2.137     | <N1–O>                |           |
|                      |           |                       |           |
| M3–O2 <sup>8</sup>   | 1.671(7)  | N3–O1 <sup>12</sup>   | 2.640(8)  |
| M3–O2                | 1.671(7)  | N3–O4 <sup>12</sup>   | 2.841(9)  |
| M3–O2 <sup>9</sup>   | 1.671(7)  | N3–O5                 | 2.593(6)  |
| M3–O13 <sup>8</sup>  | 1.99(4)   | N3–O6                 | 2.606(11) |
| M3–O13               | 1.99(4)   | N3–O8                 | 2.581(10) |
| M3–O13 <sup>9</sup>  | 1.99(4)   | N3–O10 <sup>5</sup>   | 2.601(6)  |
| <M3–O>               | 1.831     | N3–O11 <sup>14</sup>  | 2.615(12) |
|                      |           | N3–O11 <sup>5</sup>   | 2.703(12) |
| M4–O2                | 1.559(6)  | N3–X1B                | 2.947(17) |
| M4–O2 <sup>8</sup>   | 1.559(6)  | <N3–O>                | 2.681     |
| M4–O2 <sup>9</sup>   | 1.559(6)  |                       |           |
| M4–O14               | 1.594(14) | N4–O5                 | 2.819(13) |
| <M4–O>               | 1.568     | N4–O6                 | 2.54(2)   |
|                      |           | N4–O8                 | 2.44(2)   |
| Si1–O1               | 1.651(6)  | N4–O10 <sup>5</sup>   | 2.770(13) |

|         |          |                      |           |
|---------|----------|----------------------|-----------|
| Si1–O2  | 1.611(6) | N4–O11 <sup>5</sup>  | 2.49(2)   |
| Si1–O3  | 1.577(4) | N4–O11 <sup>14</sup> | 2.49(2)   |
| Si1–O4  | 1.621(7) | N4–X2A               | 2.901(19) |
| <Si1–O> | 1.615    | N4–X1B               | 2.16(2)   |
|         |          | <N4–O>               | 2.576     |

---

<sup>1</sup>2/3-Y+X,4/3-Y,1/3-Z; <sup>2</sup>-1/3+Y,-2/3+X,1/3-Z; <sup>3</sup>1/3-Y+X,5/3-Y,2/3-Z; <sup>4</sup>1+Y-X,2-X,+Z; <sup>5</sup>4/3-X,2/3-X+Y,2/3-Z; <sup>6</sup>5/3-X,1/3-X+Y,1/3-Z; <sup>7</sup>2-Y,1+X-Y,+Z; <sup>8</sup>1+Y-X,1-X,+Z; <sup>9</sup>1-Y,+X-Y,+Z; <sup>10</sup>5/3-X,4/3-X+Y,1/3-Z; <sup>11</sup>1/3-Y+X,2/3-Y,2/3-Z; <sup>12</sup>1/3+Y,-1/3+X,2/3-Z; <sup>13</sup>1-Y,1+X-Y,+Z; <sup>14</sup>4/3-Y+X,5/3-Y,2/3-Z; <sup>15</sup>2/3+Y,1/3+X,1/3-Z
