# Supplementary material for: Zr-Rich Eudialyte from the Lovozero Peralkaline Massif, Kola Peninsula, Russia
Source: MDPI journal article supplement (doi:10.3390/min11090982), 2021-09-09
Supplement: s1 [file s1]

**Table S2 Anisotropic Displacement Parameters ( $\text{\AA}^2 \times 10^3$ ) for Iv-153–178. The Anisotropic displacement factor exponent takes the form:  $-2\pi^2[h^2a^{*2}U_{11}+2hka^*b^*U_{12}+\dots]$ .**

| Atom | U <sub>11</sub> | U <sub>22</sub> | U <sub>33</sub> | U <sub>23</sub> | U <sub>13</sub> | U <sub>12</sub> |
|------|-----------------|-----------------|-----------------|-----------------|-----------------|-----------------|
| M1B  | 12.2(5)         | 21.3(5)         | 10.2(5)         | 0.50(17)        | 1.0(3)          | 6.1(3)          |
| Ce1  | 12.2(5)         | 21.3(5)         | 10.2(5)         | 0.50(17)        | 1.0(3)          | 6.1(3)          |
| M2A  | 60(2)           | 60(2)           | 15.6(14)        | 19.9(11)        | −19.9(11)       | −44(2)          |
| M2B  | 60(2)           | 60(2)           | 16(2)           | 19.9(14)        | −19.9(14)       | −43.7(11)       |
| M3   | 28.7(15)        | 28.7(15)        | 67(3)           | 0               | 0               | 14.4(8)         |
| M4   | 7(4)            | 7(4)            | 19(6)           | 0               | 0               | 4(2)            |
| O1   | 15.6(16)        | 15.6(16)        | 35(2)           | 0.4(9)          | −0.4(9)         | 9.4(19)         |
| O2   | 33(2)           | 25(3)           | 17(2)           | −11.1(18)       | −5.5(9)         | 12.5(13)        |
| O3   | 39(2)           | 24(3)           | 15(2)           | 3.7(18)         | 1.9(9)          | 12.0(13)        |
| O4   | 19.6(16)        | 19.6(16)        | 18(2)           | 2.0(9)          | −2.0(9)         | 8.3(19)         |
| O5   | 20.7(18)        | 29.0(19)        | 21.1(15)        | −0.4(14)        | 0.1(13)         | −2.1(16)        |
| O6   | 21.1(17)        | 21.1(17)        | 23(2)           | −4.6(10)        | 4.6(10)         | 6(2)            |
| O7   | 35(2)           | 29.2(19)        | 26.5(17)        | 7.7(14)         | 0.3(14)         | 17.7(17)        |
| O8   | 20.5(16)        | 29.6(18)        | 15.5(13)        | −3.3(13)        | −1.3(12)        | 13.4(14)        |
| O9   | 50(6)           | 50(6)           | 51(10)          | 0               | 0               | 25(3)           |
| O10  | 48(3)           | 14(3)           | 107(5)          | −11(3)          | −5.3(16)        | 7.2(14)         |
| Si1  | 17.2(6)         | 10.1(8)         | 11.1(7)         | −1.1(6)         | −0.5(3)         | 5.0(4)          |
| Si3  | 14.8(6)         | 19.4(9)         | 21.1(8)         | −6.3(7)         | −3.1(3)         | 9.7(4)          |
| Si5  | 10.4(6)         | 17.0(6)         | 12.6(5)         | 0.6(4)          | −0.2(4)         | 6.9(5)          |
| Z1   | 13.2(4)         | 14.2(3)         | 9.7(3)          | −0.56(12)       | −1.1(2)         | 6.60(19)        |
| N1A  | 24.8(14)        | 24.8(14)        | 20.6(19)        | 6.0(9)          | −6.0(9)         | 6.7(17)         |
| N1B  | 25(4)           | 25(4)           | 22(6)           | 13(3)           | −13(3)          | −3(5)           |
| N5   | 38(4)           | 38(4)           | 91(19)          | 0               | 0               | 18.8(19)        |
| N4   | 71(2)           | 26.3(11)        | 61.1(19)        | −19.8(7)        | −39.7(14)       | 35.3(11)        |
| Sr1  | 71(2)           | 26.3(11)        | 61.1(19)        | −19.8(7)        | −39.7(14)       | 35.3(11)        |
| X1   | 160(11)         | 160(11)         | 101(9)          | −10(3)          | 10(3)           | 123(12)         |
| X2A  | 50(6)           | 50(6)           | 51(10)          | 0               | 0               | 25(3)           |
| X2C  | 40(10)          | 40(10)          | 56(17)          | 0               | 0               | 20(5)           |
