# Supplementary material for: Zr-Rich Eudialyte from the Lovozero Peralkaline Massif, Kola Peninsula, Russia
Source: MDPI journal article supplement (doi:10.3390/min11090982), 2021-09-09
Supplement: s1 [file s1]

**Table S1. Selected bond lengths for crystal structure lv-153-178**

| <b>Bond</b>          | <b>Length</b> | <b>Bond</b>          | <b>Length</b> |
|----------------------|---------------|----------------------|---------------|
| Z1–O3 <sup>4</sup>   | 2.078(4)      | Si3–O10              | 1.599(5)      |
| Z1–O3 <sup>2</sup>   | 2.078(4)      | <Si3–O>              | 1.615         |
| Z1–O7 <sup>3</sup>   | 2.072(3)      |                      |               |
| Z1–O7                | 2.072(3)      | Si5–O5 <sup>6</sup>  | 1.642(3)      |
| Z1–O7 <sup>5</sup>   | 2.072(3)      | Si5–O6               | 1.640(2)      |
| Z1–O7 <sup>6</sup>   | 2.073(3)      | Si5–O7               | 1.593(3)      |
| <Z1–O>               | 2.074         | Si5–O8               | 1.603(3)      |
|                      |               | <Si5–O>              | 1.620         |
| M1B–O2               | 2.317(2)      |                      |               |
| M1B–O2 <sup>7</sup>  | 2.317(2)      | N1A–O1               | 2.589(5)      |
| M1B–O7 <sup>3</sup>  | 2.392(3)      | N1A–O3               | 2.636(3)      |
| M1B–O7               | 2.392(3)      | N1A–O3 <sup>2</sup>  | 2.636(3)      |
| M1B–O7 <sup>5</sup>  | 2.362(3)      | N1A–O5 <sup>17</sup> | 2.730(5)      |
| M1B–O7 <sup>6</sup>  | 2.362(3)      | N1A–O5               | 2.730(5)      |
| <M1B–O>              | 2.357         | N1A–O6               | 2.608(6)      |
|                      |               | N1A–O7 <sup>17</sup> | 2.608(4)      |
| M3–O10 <sup>2</sup>  | 1.738(6)      | N1A–O7               | 2.608(4)      |
| M3–O10 <sup>1</sup>  | 1.738(6)      | <N1A–O>              | 2.643         |
| M3–O10               | 1.738(6)      |                      |               |
| M3–O11 <sup>2</sup>  | 1.96(3)       | N1B–O1               | 2.865(17)     |
| M3–O11               | 1.96(3)       | N1B–O3               | 2.832(11)     |
| M3–O11 <sup>1</sup>  | 1.96(3)       | N1B–O3 <sup>2</sup>  | 2.484(7)      |
| <M3–O>               | 1.849         | N1B–O6               | 2.484(7)      |
|                      |               | N1B–O5               | 2.830(13)     |
| M4–O10 <sup>1</sup>  | 1.548(6)      | N1B–O7               | 2.483(7)      |
| M4–O10               | 1.548(6)      | N1B–O7 <sup>17</sup> | 2.483(7)      |
| M4–O10 <sup>2</sup>  | 1.548(6)      | N1B–X2B              | 2.15(4)       |
| M4–X2C               | 1.59(3)       | <N1B– O>             | 2.576         |
| <M4–O>               | 1.559         |                      |               |
|                      |               | N4–O2 <sup>4</sup>   | 2.855(5)      |
| Si1–O1               | 1.646(2)      | N4–O4 <sup>18</sup>  | 2.651(4)      |
| Si1–O1 <sup>1</sup>  | 1.646(2)      | N4–O7                | 2.834(4)      |
| Si1–O2               | 1.580(4)      | N4–O7 <sup>5</sup>   | 2.835(4)      |
| Si1–O3               | 1.604(4)      | N4–O8 <sup>5</sup>   | 2.477(3)      |
| <Si1–O>              | 1.619         | N4–O8                | 2.477(3)      |
|                      |               | N4–O9                | 2.558(3)      |
| Si3–O4 <sup>15</sup> | 1.577(4)      | N4–O11               | 2.771(11)     |
| Si3–O5 <sup>15</sup> | 1.642(3)      | N4–O11 <sup>2</sup>  | 2.771(11)     |
| Si3–O5 <sup>16</sup> | 1.641(3)      | <N4 –>               | 2.692         |

<sup>1</sup>1+Y-X,1-X,+Z; <sup>2</sup>1-Y,+X-Y,+Z; <sup>3</sup>2/3-X,1/3-Y,4/3-Z; <sup>4</sup>-1/3+Y,1/3-X+Y,4/3-Z; <sup>5</sup>+X,+X-Y,+Z; <sup>6</sup>2/3-X,1/3-X+Y,4/3-Z; <sup>7</sup>1/3-Y+X,-1/3+X,5/3-Z; <sup>8</sup>1/3+Y,2/3-X+Y,5/3-Z; <sup>9</sup>2/3-Y+X,1/3+X,4/3-Z; <sup>10</sup>2/3+Y-X,1/3+Y,1/3+Z; <sup>11</sup>2/3+Y-X,4/3-X,1/3+Z; <sup>12</sup>1/3-Y+X,-1/3+X,2/3-Z; <sup>13</sup>1/3+Y,2/3-X+Y,2/3-Z; <sup>14</sup>4/3-X,2/3-Y,2/3-Z; <sup>15</sup>4/3-Y,2/3+X-Y,-1/3+Z; <sup>16</sup>1/3+X,2/3+X-Y,-1/3+Z; <sup>17</sup>1-Y,1-X,+Z; <sup>18</sup>1/3+Y-X,2/3-X,-1/3+Z; <sup>19</sup>1-X,1-Y,1-Z
